# Supplementary material
Source: Research Square preprint supplement (doi:10.21203/rs.3.rs-8342646/v1)
Supplement: Supplementary file 1 [file f487e49484d285a538355a83.docx]

**GLUCAGON-LIKE PEPTIDE-1 RECEPTOR AGONISTS IMPROVE LIVER AND OTHER METABOLIC HEALTH OUTCOMES IN TYPE 2 DIABETES AND OBESITY REGARDLESS OF PRIOR DIAGNOSIS OF LIVER DISEASE IN ROUTINE CLINICAL PRACTICE**

Kavin D. Parmar MBBS1, Ana Carolina Beatriz Pereira MD1, Vinay Jahagirdar MBBS1, Ekaterina Smirnova PhD1,2 and Arun J. Sanyal MBBS MD1.

Table of contents:

Supplemental Figure 1 page 2

Supplemental Figure 2 page 3

Supplemental Figure 3 page 4

Supplemental Figure 4 page 5

Supplemental Figure 5 page 6

Supplemental Table 1 page 7

Supplemental Table 2 page 10

Supplemental Table 3 page 11

Supplemental Table 4 page 12

Supplemental Table 5 page 13

**
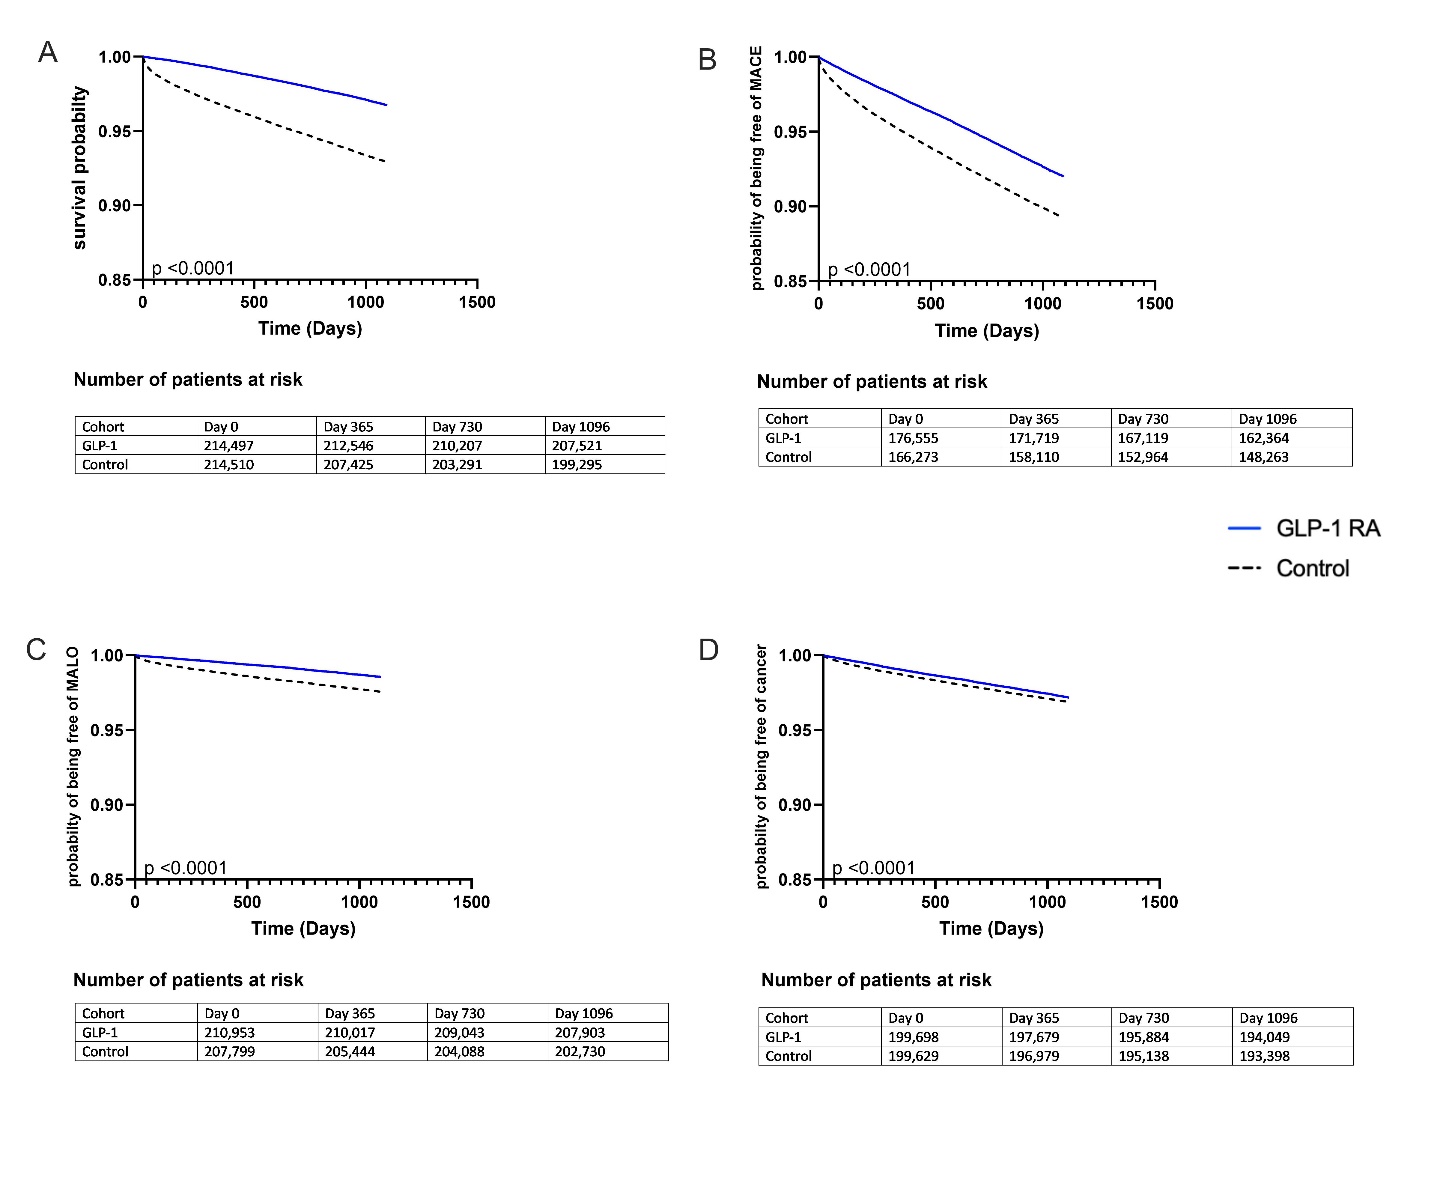
**

**Supplemental Figure 1:** Kaplan Meier plots for any GLP-1 RA use with a minimum exposure for 2 years and outcomes assessed within three additional years after exposure. (Composite outcomes). Data for mortality are shown in panel A. Panels B, C and D reflect time to outcome probability for MACE, MALO and cancers. For these analyses, only individuals who did not have the outcome prior to initiation of GLP-1 RA were included. These data demonstrate that GLP-1 RA prolonged time to all of the outcomes and the overall risk of outcomes (p< 0.0001 by log rank test).

**
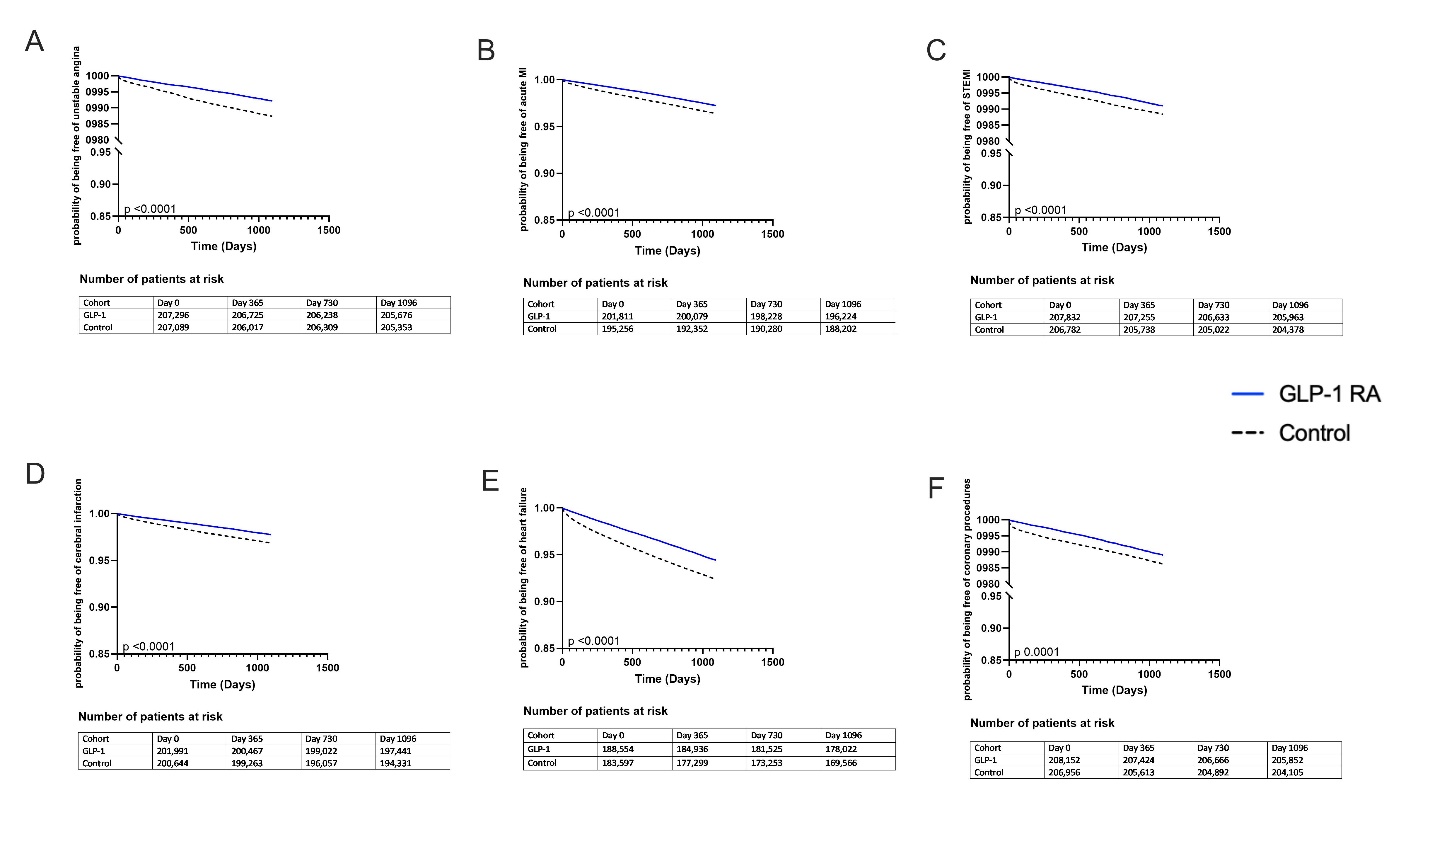
**

**Supplemental Figure 2:** Kaplan Meier plots for any GLP-1 RA use with a minimum exposure for 2 years and cardiovascular outcomes assessed within three additional years after exposure. Data for unstable angina (Panel A), acute myocardial infarction (MI) (Panel B), ST elevated MI (STEMI) (Panel C), cerebral infarction (Panel D), Heart failure (Panel E) and coronary revascularization (Panel F) are shown. For these analyses, only individuals who did not have the outcome prior to initiation of GLP-1 RA were included. These data demonstrate that GLP-1 RA prolonged time to all of the outcomes and the overall risk of outcomes (p< 0.0001 by log rank test).

**
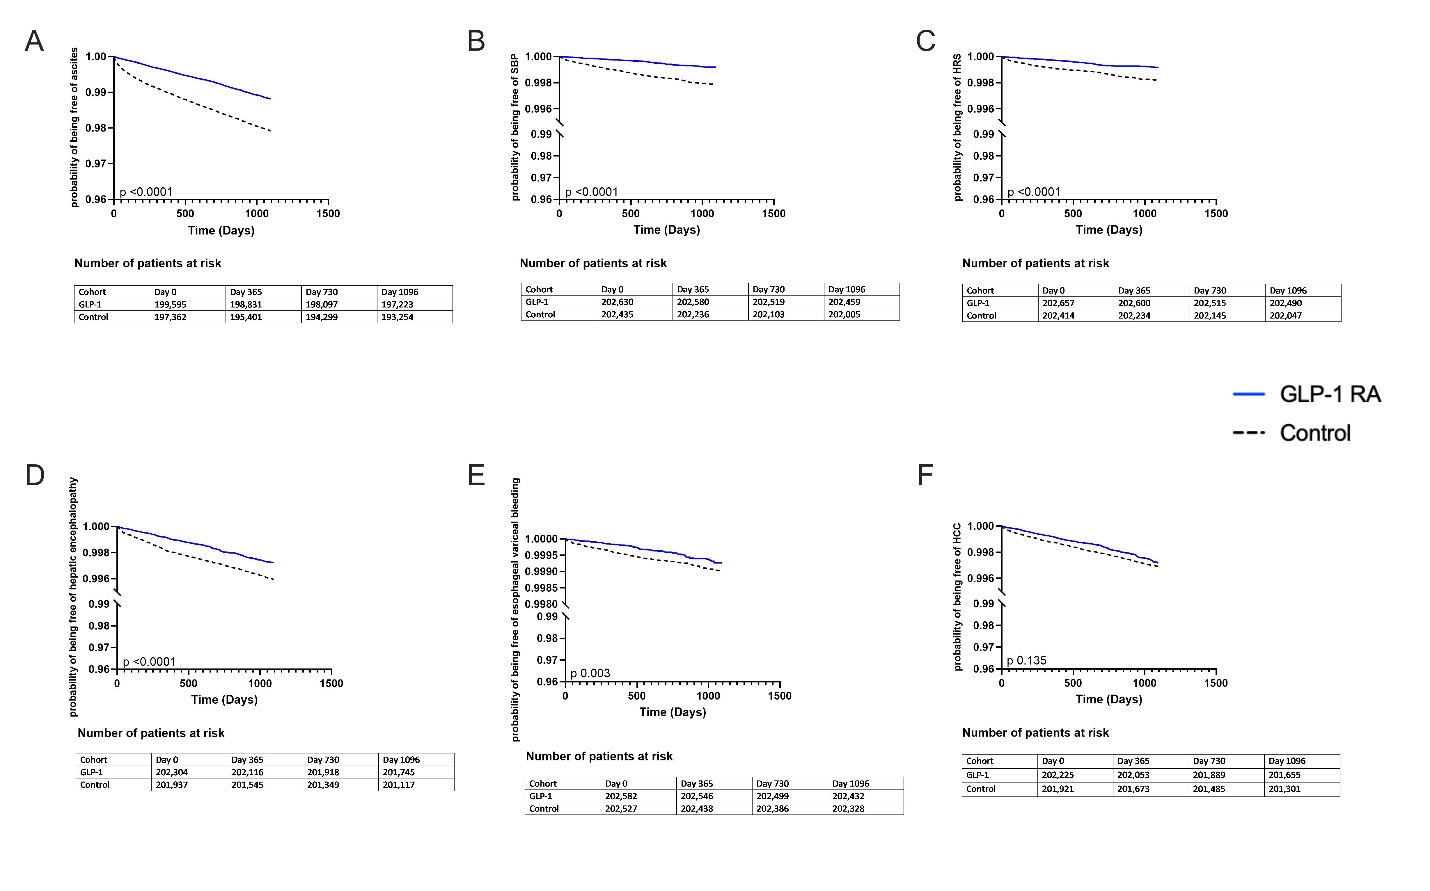
Supplemental Figure 3**: Kaplan Meier plots for any GLP-1 RA use with a minimum exposure for 2 years and liver related outcomes assessed within three additional years after exposure. Data for ascites(Panel A), spontaneous bacterial peritonitis (SBP) (Panel B), hepatorenal syndrome (HRS) (Panel C), hepatic encephalopathy (Panel D), esophageal variceal bleeding (Panel E) and hepatocellular carcinoma (HCC) (Panel F) are shown. For these analyses, only individuals who did not have the outcome prior to initiation of GLP-1 RA were included. These data demonstrate that GLP-1 RA prolonged time to all of the outcomes and the overall risk of outcomes (p< 0.0001 by log rank test).

**
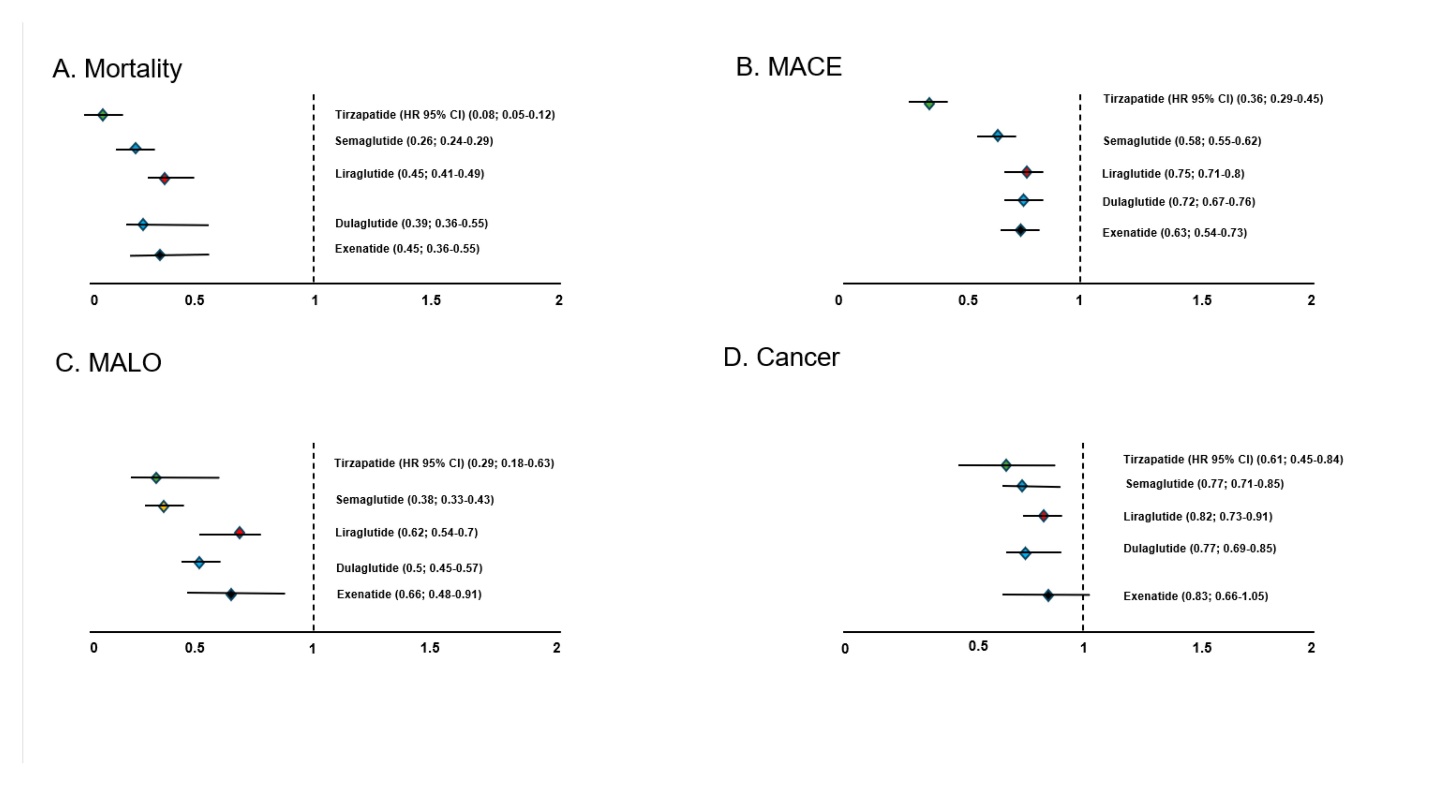
Supplemental Figure 4:** Cox proportional hazards models were used to define hazard ratios (H.R.) with 95% CI for specific outcomes for individual GLP-1 RA based on a minimum exposure of 2 years plus three additional years of follow up. Each analysis compared the GLP-1 RA to a propensity matched control that did not receive GLP-1 RA and these analyses do not represent a head-to-head comparison of individual gLP-1 RA. All of the GLP-1 RA were improved mortality, MACE, MALO and cancer with the exception of Exenatide where the 95% CI intersected 1.

**
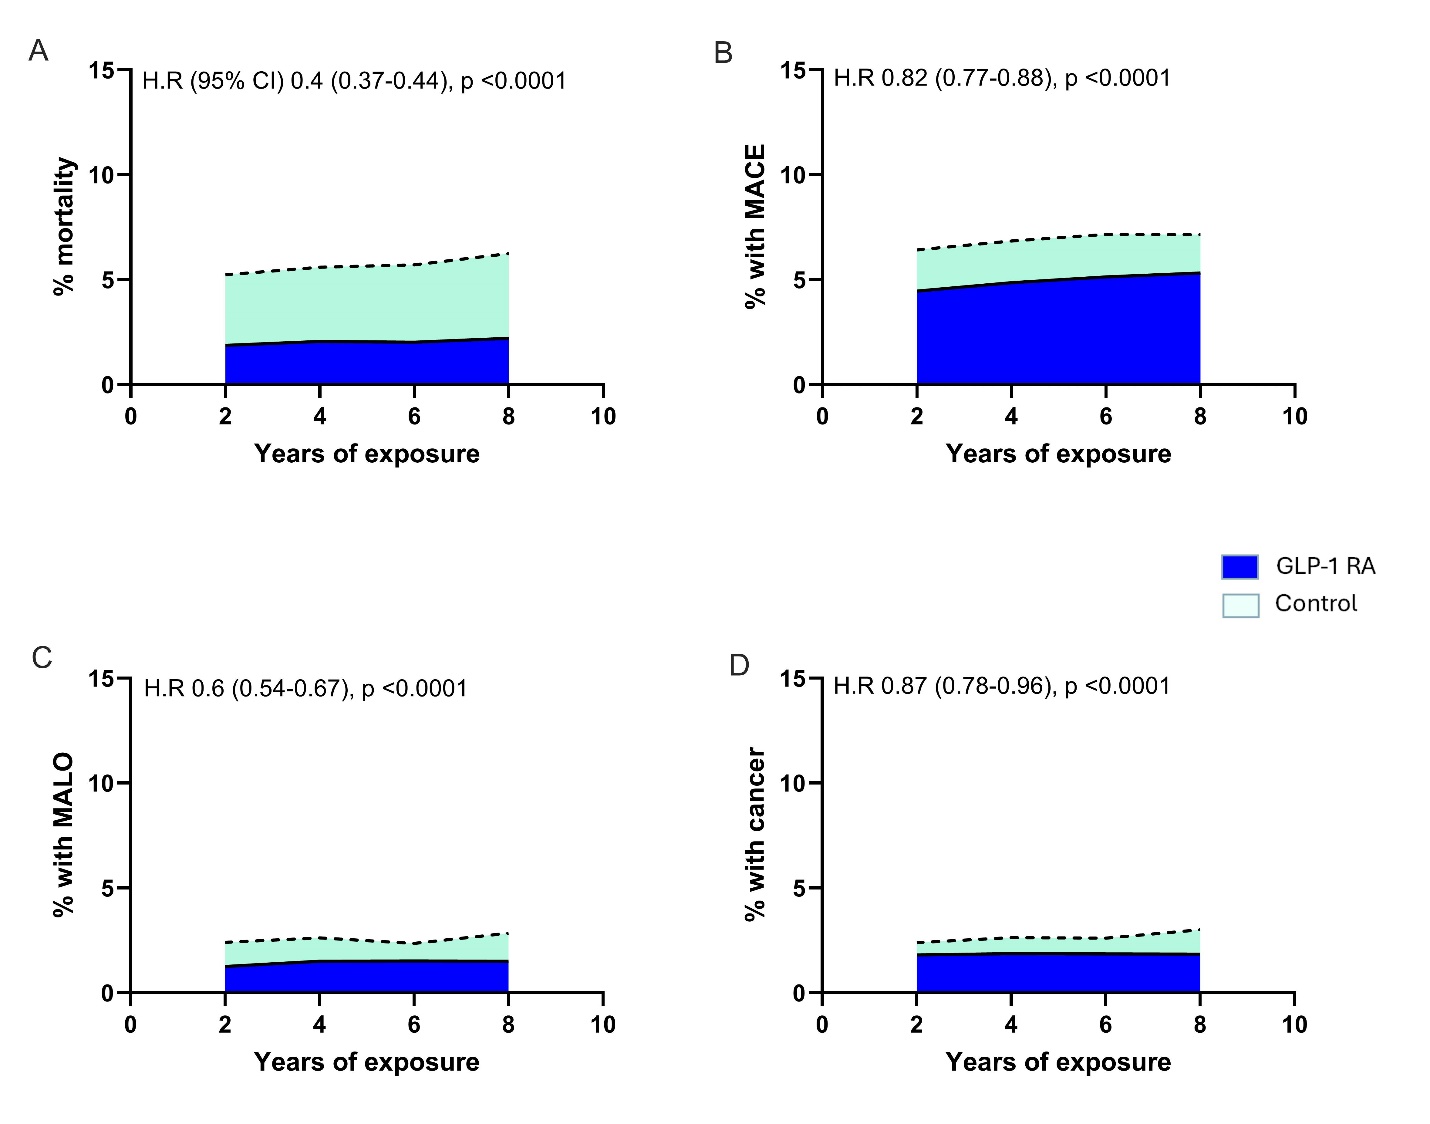
**

**Supplemental Figure 5:** The absolute risk of mortality (panel A), MACE (panel B), MALO (panel C) and cancers (panel D) in those with T2DM and obesity who also had a diagnosis of MASLD prior to the initiation of GLP-1 RA. The dotted line and shaded area below it represents the risks for control groups whereas the solid line and blue shaded area below it represent the risks for individuals receiving GLP-1 RA for at least 2, 4, 6 or 8 years followed by 3 additional years over which outcomes were measured.

**Supplemental Table 1: codes**

| Diagnosis | ICD-10 /CPT/Trinetx (TNX) curated /RxNorm/ATC/VA codes |
| --- | --- |
| INCLUSION |  |
| T2DM + BMI ≥ 30 + GLP-1 | E11 + TNX 9083 + A10BJ/ 2601723/ 60548/ 1991302/ 475968/ 1551291 |
|  |  |
| Cardiovascular related (MACE) |  |
| Unstable Angina | I20.0 |
| Acute Myocardial Infarction | I21 |
| STEMI | I21.0, I21.1, I21.2, I21.3, I21.29, I21.11, I21.21, I21.01, I21.02 |
| NSTEMI | I21.4 |
| Other MI | I21.A9 |
| Stroke | I63 |
| Heart Failure | I50 |
| Heart Failure with reduced ejection fraction | I50.2 |
| Heart Failure with preserved ejection fraction | I50.3 |
| Coronary Procedures | 1021141 |
|  |  |
| Liver Related (MALO) |  |
| Ascites | R18 |
| Hepatic Encephalopathy | K76.82 |
| Esophageal varices with bleeding | I85.01 |
| Spontaneous Bacterial Peritonitis | K65.2 |
| Hepatocellular Carcinoma | C22, C22.0 |
| Hepatorenal Syndrome | K76.7 |
|  |  |
| Cancers |  |
| Breast cancer | C50 |
| Ovarian cancer | C56 |
| Endometrial cancer | C54.1 |
| Esophageal cancer | C15 |
| Gastric cancer | C16 |
| Gallbladder cancer | C23 |
| Pancreatic cancer | C25 |
| Hepatocellular cancer | C22, C22.0 |
| Colon cancer | C18 |
| Rectal cancer | C20 |
| Renal cell cancer | C64, C65 |
| Thyroid papillary cancer | C73 |
| Prostate cancer | C61 |
|  |  |
| Micro-angiopathic and other complications |  |
| Diabetic ophthalmic complications | E11.3, E11.51, E11.39, E11.311 |
| Blindness | H54 |
| Peripheral neuropathy | G62, E11.40 |
| Hypertension | I10 |
| Chronic kidney Disease | N18 |
| Use of Dialysis | 1012740 |
| Gastroparesis | K31.84 |
| Acute cholecystitis | K81.0 |
| cholecystectomy | 1014153, 47562, 45595009 |
| Acute pancreatitis | K85 |
| Any fracture | M84, M84.4, M84.40XA |
| Thyroid cancer | C73 |
|  |  |
| Laboratory tests |  |
| Hemoglobin | TNX-9014 |
| Platelets | TNX-9020 |
| LDL-cholesterol | TNX-9002 |
| Hb A1C | TNX-9037 |
| AST | TNX-9047 |
| Bilirubin | TNX-9050 |
| INR | TNX-9032 |
| Creatinine | TNX- 9024 |
| ALT | TNX-9044 |
| ALP | TNX-9046 |
|  |  |
| Comorbid Conditions |  |
| BMI | TNX- 8083 |
| Ischemic Heart Disease | I20-25 |
| CKD | N18 |
| Hypertension | I10 |
| Heart Failure | I50 |
| Fatty liver Disease | K76.0 |
| NASH | K75.81 |
| Cirrhosis | K74 |
| Smoker | F17.20 |
| Stroke | I63 |
| Malignant (primary) neoplasm, unspecified | C80.1 |
|  |  |
| Medications |  |
| GLP-1 analgues | ATC: A10BJ |
| Tirzapetide | RxNorm: 2601723 |
| Semaglutide | RxNorm: 1991302 |
| Liraglutide | RxNorm: 475968 |
| Exenatide | RxNorm: 60548 |
| Dulaglutide | RxNorm: 1551291 |
| Diuretics | ATC: C03 |
| Atorvastatin | RxNorm: 83367 |
| Rosuvastatin | RxNorm: 301542 |
| Simvastatin | RxNorm: 36567 |
| Pravastatin | RxNorm: 42463 |
| Lovastatin | RxNorm: 6472 |
| Fluvastatin | RxNorm: 41127 |
| Angiotensin 2 inhibitors | VA: CV805 |
| SGLT-2 inhibitors | ATC: A10BK |

**Supplemental Table 2: Impact of GLP-1 RA on micro-angiopathic and other complications**

|  | After 4 years of exposure | | | After 8 years of exposure | | |
| --- | --- | --- | --- | --- | --- | --- |
|  | GLP-1 RA (%)  N=93,413 | Control (%)  N=93,413 | HR (95% CI) | GLP-1 RA (%)  N=20,661 | Control (%)  N=20,661 | HR (95% CI) |
| Diabetic ophthalmic  complications | 5.51 | 4.44 | 1.5(1.43-1.57) | 6.03 | 5.12 | 1.51(1.37-1.65) |
| Blindness | 0.72 | 1.05 | 0.68(0.62-0.76) | 0.76 | 1.13 | 0.84(0.68-1.04) |
| Peripheral neuropathy | 5.39 | 6.54 | 0.98(0.94-1.03) | 4.91 | 6.95 | 0.88(0.8-0.97) |
| Hypertension | 15.96 | 25.54 | 0.67(0.64-0.71) | 15.59 | 29.62 | 0.58(0.51-0.66) |
| Chronic kidney Disease | 5.47 | 7.07 | 0.98(0.94-1.03) | 5.82 | 7.99 | 0.91(0.83-0.99) |
| Use of Dialysis | 0.49 | 1.36 | 0.42(0.37-0.46) | 0.47 | 1.48 | 0.38(0.3-0.48) |
| Gastroparesis | 0.76 | 0.86` | 1.06(0.95-1.17) | 0.72 | 0.91 | 1(0.8-1.24) |
|  | **Safety endpoints** | | | | | |
| Acute cholecystitis | 0.23 | 0.38 | 0.72(0.61-0.86) | 0.23 | 0.45 | 0.63(0.44-0.91) |
| cholecystectomy | 0.45 | 0.67 | 0.78(0.68-0.88) | 0.48 | 0.75 | 0.78(0.6-1.01) |
| Acute pancreatitis | 0.48 | 0.92 | 0.6(0.54-0.68) | 0.41 | 0.93 | 0.54(0.41-0.7) |
| Any fracture | 0.37 | 0.56 | 0.78(0.68-0.9) | 0.4 | 0.6 | 0.84(0.63-1.12) |
| Thyroid cancer | 0.12 | 0.12 | 1.12(0.86-1.46) | 0.11 | 0.1 | 1.27(0.7-2.32) |

Absolute rates of cumulative incidence are reported within 2 different time-frames (4 yrs and 8 years) of exposure.

**Supplemental table 3: GLP in MASLD- MACE components after exposure for 2 and 8 years**

|  | After 2 years of exposure | | | After 8 years of exposure | | |
| --- | --- | --- | --- | --- | --- | --- |
|  | GLP-1 RA (%) N=38395 | Control  (%) N=38395 | HR 95% CI | GLP-1 RA (%) N=4388 | Control (%) N=4388 | HR 95% CI |
| Unstable Angina | 0.47 | 0.72 | 0.77(0.64-0.94) | 0.54 | 0.71 | 0.89(0.51-1.54) |
| Acute MI | 1.5 | 2.2 | 0.8(0.72-0.89) | 1.79 | 2.71 | 0.78(0.58-1.06) |
| STEMI | 0.54 | 0.76 | 0.81(0.68-0.97) | 0.51 | 1.07 | 0.57(0.34-0.96) |
| NSTEMI/Other MI | 0.77 | 1.25 | 0.72(0.62-0.84) | 0.83 | 1.38 | 0.71(0.46-1.08) |
| Stroke | 1.25 | 1.74 | 0.84(0.74-0.95) | 1.43 | 2.05 | 0.8(0.57-1.12) |
| Heart Failure | 3.02 | 4.56 | 0.78(0.72-0.84) | 3.66 | 4.96 | 0.91(0.72-1.14) |
| HFrEF | 1.33 | 1.81 | 0.86(0.76-0.96) | 1.86 | 1.63 | 1.35(0.97-1.88) |
| HFpEF | 2.15 | 3.18 | 0.79(0.72-0.87) | 2.74 | 3.51 | 0.94(0.72-1.21) |
| Coronary Procedures | 0.63 | 0.8 | 0.91(0.77-1.08) | 0.63 | 0.95 | 0.8(0.49-1.31) |

Absolute rates of cumulative incidence are reported within 2 different time-frames (2 yrs and 8 years) of exposure.

**Supplemental table 4: GLP in MASLD- MALO components after exposure for 2 and 8 years**

|  | After 2 years of exposure | | | After 8 years of exposure | | |
| --- | --- | --- | --- | --- | --- | --- |
|  | GLP-1 RA (%)  N=38403 | Control (%) N=38403 | HR 95% CI | GLP-1 RA (%)N=6272 | Control (%) N=6272 | HR 95% CI |
| Ascites | 1.04 | 2.22 | 0.53(0.47-0.6) | 1.25 | 2.34 | 0.42(0.31-0.55) |
| Hepatic Encephalopathy | 0.29 | 0.66 | 0.51(0.41-0.63) | 0.17 | 0.6 | 0.22(0.11-0.43) |
| Esophageal Varices with Bleeding | 0.07 | 0.13 | 0.61(0.39-0.98) | - | - | - |
| Spontaneous Bacterial Peritonitis | 0.06 | 0.21 | 0.3(0.19-0.47) | - | - | - |
| Heptorenal Syndrome | 0.07 | 0.31 | 0.27(0.18-0.41) | - | - | - |
| Hepatocellular Carcinoma | 0.24 | 0.43 | 0.67(0.52-0.87) | 0.25 | 0.33 | 0.58(0.3-1.11) |

Absolute rates of cumulative incidence are reported within 2 different time-frames (2 yrs and 8 years) of exposure. (For Esophageal varices with bleeding, SBP and HCC at 8 years, the patient count was too small to report results). MALO stands for major adverse liver outcomes

**Supplemental table 5: GLP in Cirrhosis- MALO components at 2 and 8 years**

|  | After 2 years of exposure | | | After 8 years of exposure | | |
| --- | --- | --- | --- | --- | --- | --- |
|  | GLP-1 RA (%)  N=6333 | Control (%) N=6333 | HR 95% CI | GLP-1 RA (%)N=809 | Control (%) N=809 | HR 95% CI |
| Ascites | 4.93 | 9.52 | 0.56(0.48-0.65) | 4.52 | 9.76 | 0.53(0.34-0.83) |
| Hepatic Encephalopathy | 2.53 | 3.95 | 0.69(0.56-0.85) | 2.81 | 3.35 | 1.01(0.56-1.83) |
| Esophageal Varices with Bleeding | 0.65 | 0.87 | 0.8(0.53-1.2) | - | - | - |
| Spontaneous Bacterial Peritonitis | 0.57 | 1.25 | 0.49(0.33-0.73) | - | - | - |
| Heptorenal Syndrome | 0.79 | 1.62 | 0.52(0.37-0.73) | 1.7 | 1.73 | 1.14(0.52-2.46) |
| Hepatocellular Carcinoma | 1.29 | 1.62 | 0.88(0.65-1.18) | 1.86 | 1.77 | 1.18(0.55-2.53) |

Absolute rates of cumulative incidence are reported within 2 different time-frames (2 yrs and 8 years) of exposure. (For Esophageal varices with bleeding and Spontaneous Bacterial Peritonitis at 8 years, the patient count was too small to report results). MALO stands for major adverse liver outcomes.
